# Supplementary material for: New and Efficient Implementation of CC3
Source: PubMed Central journal article supplement (PMC8016187; doi:10.1021/acs.jctc.0c00686), 2020-12-02
Supplement: ct0c00686_si_001.pdf [file ct0c00686_si_001.pdf]

# Supporting information for *A new and efficient implementation of CC3*

Alexander C. Paul,<sup>†</sup> Rolf H. Myhre,<sup>†</sup> and Henrik Koch<sup>\*,†,‡</sup>

<sup>†</sup>*Department of Chemistry, Norwegian University of Science and Technology, NTNU, 7491  
Trondheim, Norway*

<sup>‡</sup>*Scuola Normale Superiore, Piazza dei Cavalieri 7, 56126 Pisa, Italy*

E-mail: henrik.koch@sns.it

## Supporting Information Available

Here we report equations and pseudocode for the Jacobian transformations and the transition densities. For a concise notation, we define

$$\bar{R}_{ij}^{ab} = (1 + \delta_{ij}\delta_{ab})R_{ij}^{ab}. \quad (1)$$

### Algorithms to calculate Jacobian transformations

The equations and the algorithm to compute the Jacobian transformation of a trial vector  $\mathbf{R}$  are reported in Algorithm 1. The transformed vector is denoted by  $\boldsymbol{\rho}$  and the indices are chosen such that the triples amplitudes have the indices  $a, b, c, i, j, k$ . The intermediates,  $\tilde{Z}_{abid}^v$  and  $\tilde{Z}_{ajil}^o$ , are constructed outside the iterative loop as discussed in the Implementation section of the paper.

The equations and the algorithm for the transpose Jacobian transformation are shown in Algorithm 2 where  $\boldsymbol{\sigma}$  denotes the transformed vector.

---

**Algorithm 1** CC3 Jacobian transformation algorithm.

---

**while** not converged **do**

$$\Upsilon_{kc} \leftarrow \sum_l (2g_{kcl}d - g_{kld}c) R_l^d$$

**for**  $i = 1, n_O$  **do**

**for**  $j = 1, i$  **do**

**for**  $k = 1, j$  **do**

$$\tau_{ijk}^{abc} \leftarrow -(\varepsilon_{ijk}^{abc})^{-1} P_{ijk}^{abc} \left( \sum_d \tau_{ij}^{ad} g_{bdck} - \sum_l \tau_{il}^{ab} g_{ljck} \right)$$

$$\tilde{\tau}_{ijk}^{abc} \leftarrow 4\tau_{ijk}^{abc} - 2\tau_{ijk}^{acb} - 2\tau_{ijk}^{cba} - 2\tau_{ijk}^{bac} + \tau_{ijk}^{bca} + \tau_{ijk}^{cab}$$

**for** Permutations of  $i, j, k$  **do**

$$\tilde{\rho}_{ij}^{ab} += \sum_c \tilde{\tau}_{ijk}^{abc} \Upsilon_{kc}$$

**end for**

**end for**

**end for**

**end for**

$$\Upsilon_{bdck} \leftarrow \sum_e R_k^e g_{bdce} - \sum_m (R_m^b g_{mdck} + R_m^c g_{bdmk})$$

$$\Upsilon_{ljck} \leftarrow \sum_e (R_j^e g_{leck} + R_k^e g_{ljce}) - \sum_m R_m^c g_{ljmk}$$

**for**  $i = 1, n_O$  **do**

**for**  $j = 1, i$  **do**

**for**  $k = 1, j$  **do**

$$R_{ijk}^{abc} \leftarrow (\omega - \varepsilon_{ijk}^{abc})^{-1} P_{ijk}^{abc} \left( \sum_d \bar{R}_{ij}^{ad} g_{bdck} - \sum_l \bar{R}_{il}^{ab} g_{ljck} \right. \\ \left. + \sum_d \tau_{ij}^{ad} \Upsilon_{bdck} - \sum_l \tau_{il}^{ab} \Upsilon_{ljck} \right)$$

$$\tilde{R}_{ijk}^{abc} \leftarrow 4R_{ijk}^{abc} - 2R_{ijk}^{acb} - 2R_{ijk}^{cba} - 2R_{ijk}^{bac} + R_{ijk}^{bca} + R_{ijk}^{cab}$$

**for** Permutations of  $i, j, k$  **do**

$$\rho_i^a += \sum_{bc} \tilde{R}_{ijk}^{abc} g_{jbkc}$$

$$\tilde{\rho}_{ij}^{ab} += \sum_c \tilde{R}_{ijk}^{abc} F_{kc}$$

$$\tilde{\rho}_{il}^{ab} -= \sum_c \tilde{R}_{ijk}^{abc} g_{jlkc}$$

$$\tilde{\rho}_{ij}^{ad} += \sum_{bc} \tilde{R}_{ijk}^{abc} g_{dbkc}$$

**end for**

**end for**

**end for**

**end for**

$$\tilde{\rho}_{il}^{ab} += \sum_d \tilde{Z}_{abid}^v R_l^d$$

$$\tilde{\rho}_{ij}^{ad} -= \sum_l \tilde{Z}_{ajil}^o R_l^d$$

$$\rho_{ij}^{ab} += \frac{1}{3(1+\delta_{ai,bj})} P_{ij}^{ab} (2\tilde{\rho}_{ij}^{ab} + \tilde{\rho}_{ij}^{ba})$$

**end while**

---

---

**Algorithm 2** CC3 transpose Jacobian transformation algorithm.

---

**while** not converged **do**

**for**  $i = 1, n_O$  **do**

**for**  $j = 1, i$  **do**

**for**  $k = 1, j$  **do**

$$\begin{aligned}\tau_{ijk}^{abc} &\leftarrow -(\varepsilon_{ijk}^{abc})^{-1} P_{ijk}^{abc} \left( \sum_d \tau_{ij}^{ad} g_{bdck} - \sum_l \tau_{il}^{ab} g_{ljck} \right) \\ \tilde{\tau}_{ijk}^{abc} &\leftarrow 4\tau_{ijk}^{abc} - 2\tau_{ijk}^{acb} - 2\tau_{ijk}^{cba} - 2\tau_{ijk}^{bac} + \tau_{ijk}^{bca} + \tau_{ijk}^{cab}\end{aligned}$$

**for** Permutations of  $i, j, k$  **do**

$$Z_{ai} += \sum_{bc} L_{jk}^{bc} \tilde{\tau}_{ijk}^{abc}$$

**end for**

**end for**

**end for**

**end for**

**for**  $i = 1, n_O$  **do**

**for**  $j = 1, i$  **do**

**for**  $k = 1, j$  **do**

$$\begin{aligned}L_{ijk}^{abc} &\leftarrow (\omega - \varepsilon_{ijk}^{abc})^{-1} P_{ijk}^{abc} \left( L_i^a g_{jbkc} + L_{ij}^{ab} F_{kc} + \sum_d L_{jk}^{ad} g_{ibdc} - \sum_l L_{lk}^{ab} g_{iljc} \right) \\ \tilde{L}_{ijk}^{abc} &\leftarrow 4L_{ijk}^{abc} - 2L_{ijk}^{acb} - 2L_{ijk}^{cba} - 2L_{ijk}^{bac} + L_{ijk}^{bca} + L_{ijk}^{cab}\end{aligned}$$

**for** Permutations of  $i, j, k$  **do**

$$\sigma_{ij}^{ad} += \sum_{bc} \tilde{L}_{ijk}^{abc} g_{bdck}$$

$$\sigma_{il}^{ab} -= \sum_c \tilde{L}_{ijk}^{abc} g_{ljck}$$

$$Y_{bcek}^v += \sum_a \tilde{L}_{ijk}^{abc} \tau_{ij}^{ae}$$

$$Y_{cmjk}^o += \sum_{ab} \tilde{L}_{ijk}^{abc} \tau_{im}^{ab}$$

**end for**

**end for**

**end for**

**end for**

$$\sigma_l^d += \sum_{ai} Z_{ai} (2g_{iald} - g_{idla}) + \sum_{ab} L_{il}^{ab} \tilde{Z}_{abid}^v - \sum_{ij}^a L_{ij}^{ad} \tilde{Z}_{ajil}^o$$

$$\sigma_l^d += \sum_{jkm} Y_{dmjk}^o g_{mjlk} - \sum_{cmj} Y_{cmjl}^o g_{mjcd} - \sum_{cmk} Y_{cmlk}^o g_{mdck}$$

$$\sigma_l^d += \sum_{bec} Y_{bcel}^v g_{becd} - \sum_{bek} Y_{bdek}^v g_{lkbe} - \sum_{cek} Y_{dcek}^v g_{leck}$$

$$\sigma_{ij}^{ab} \leftarrow P_{ij}^{ab} \sigma_{ij}^{ab}$$

**end while**

---

## Algorithms to construct the transition densities

In the following the CC3 contributions to the transition densities  $\mathbf{D}^{m,0}$  and  $\tilde{\mathbf{D}}^{0,m}$  are summarized. The CCSD terms can be found for example in Table II in Ref. 1.

Substituting  $L_\mu$  in the equations for  $\mathbf{D}^{m,0}$  with  $\lambda_\mu$  results in the equations for the ground state density,  $\mathbf{D}^{0,0}$ . In this section only the algorithm for  $\tilde{\mathbf{D}}^{0,m}$  is shown, the algorithm for  $\mathbf{D}^{m,0}$  can be found in the main paper.

---

**Algorithm 3** Algorithm to compute the CC3 contribution to  $\tilde{D}^{0,m}$ .

---

**for**  $i = 1, n_O$  **do**

**for**  $j = 1, i$  **do**

**for**  $k = 1, j$  **do**

$$R_{ijk}^{abc} \leftarrow (\omega - \varepsilon_{ijk}^{abc})^{-1} P_{ijk}^{abc} \left( \sum_d \bar{R}_{ij}^{ad} g_{bdck} - \sum_l \bar{R}_{il}^{ab} g_{ljck} \right. \\ \left. + \sum_d \tau_{ij}^{ad} \Upsilon_{bdck} - \sum_l \tau_{il}^{ab} \Upsilon_{ljck} \right)$$

$$\lambda_{ijk}^{abc} \leftarrow -(\varepsilon_{ijk}^{abc})^{-1} P_{ijk}^{abc} \left( \lambda_i^a g_{jbkc} + \lambda_{ij}^{ab} F_{kc} + \sum_d \lambda_{jk}^{ad} g_{ibdc} - \sum_l \lambda_{lk}^{ab} g_{iljc} \right)$$

$$\tilde{\lambda}_{ijk}^{abc} \leftarrow 4\lambda_{ijk}^{abc} - 2\lambda_{ijk}^{acb} - 2\lambda_{ijk}^{cba} - 2\lambda_{ijk}^{bac} + \lambda_{ijk}^{bca} + \lambda_{ijk}^{cab}$$

**for** Permutations of  $i, j, k$  **do**

$$\tilde{D}_{cd}^{0,m} += \frac{1}{2} \sum_{ab} \tilde{\lambda}_{ijk}^{abc} R_{ijk}^{abd}$$

$$\tilde{D}_{ck}^{0,m} += \sum_{ab} \tilde{\lambda}_{ijk}^{abc} \bar{R}_{ij}^{ab}$$

$$\tilde{\Gamma}_{bcjk} += \sum_a \tilde{\lambda}_{ijk}^{abc} R_i^a$$

$$\text{overlap} += \frac{1}{1+\delta_{i,j}+\delta_{j,k}} \sum_{abc} \tilde{\lambda}_{ijk}^{abc} R_{ijk}^{abc}$$

**end for**

**end for**

**end for**

**end for**

**for**  $a = 1, n_V$  **do**

**for**  $b = 1, a$  **do**

**for**  $c = 1, b$  **do**

$$R_{ijk}^{abc} \leftarrow (\omega - \varepsilon_{ijk}^{abc})^{-1} P_{ijk}^{abc} \left( \sum_d \bar{R}_{ij}^{ad} g_{bdck} - \sum_l \bar{R}_{il}^{ab} g_{ljck} \right. \\ \left. + \sum_d \tau_{ij}^{ad} \Upsilon_{bdck} - \sum_l \tau_{il}^{ab} \Upsilon_{ljck} \right)$$

$$\lambda_{ijk}^{abc} \leftarrow -(\varepsilon_{ijk}^{abc})^{-1} P_{ijk}^{abc} \left( \lambda_i^a g_{jbkc} + \lambda_{ij}^{ab} F_{kc} + \sum_d \lambda_{jk}^{ad} g_{ibdc} - \sum_l \lambda_{lk}^{ab} g_{iljc} \right)$$

$$\tilde{\lambda}_{ijk}^{abc} \leftarrow 4\lambda_{ijk}^{abc} - 2\lambda_{ijk}^{acb} - 2\lambda_{ijk}^{cba} - 2\lambda_{ijk}^{bac} + \lambda_{ijk}^{bca} + \lambda_{ijk}^{cab}$$

**for** Permutations of  $a, b, c$  **do**

$$\tilde{D}_{kl}^{0,m} -= \frac{1}{2} \sum_{ij} \tilde{\lambda}_{ijl}^{abc} R_{ijk}^{abc}$$

**end for**

**end for**

**end for**

**end for**

$$\tilde{D}_{pq}^{0,m} += \sum_{i=1}^3 R_{\mu_i} \lambda_{\mu_i} (2\delta_{pq} \delta_{p,occ} - D_{pq}^{0,0})$$


---

---

**Algorithm 4** Contributions from precalculated intermediates to  $\tilde{D}^{0,m}$ .

---

$$\tilde{D}_{lk}^{0,m} += \sum_i^a Y_{alike}^o R_i^a \equiv - \sum_{ij}^{abc} \lambda_{ijk}^{abc} \tau_{jl}^{bc} R_i^a$$

$$\tilde{D}_{cd}^{0,m} += \sum_i^a Y_{acdi}^v R_i^a \equiv \sum_{ijk}^{ab} \lambda_{ijk}^{abc} \tau_{jk}^{bd} R_i^a$$

$$\tilde{D}_{ld}^{0,m} += \frac{1}{2} \sum_{ijk}^{abc} \lambda_{ijk}^{abc} \tau_{ijk}^{abd} R_l^c - \frac{1}{2} \sum_{ijk}^{abc} \lambda_{ijk}^{abc} \tau_{ijl}^{abc} R_k^d$$

$$\tilde{D}_{ld}^{0,m} += - \sum_i^{ac} Y_{acdi}^v \bar{R}_{il}^{ac} - \sum_{ik}^a Y_{alike}^o \bar{R}_{ik}^{ad}$$

$$\Gamma_{bcjk} = \frac{1}{3} (2\tilde{\Gamma}_{bcjk} + \tilde{\Gamma}_{cbjk})$$

**for** i = 1,  $n_O$  **do**

**for** j = 1, i **do**

**for** k = 1, j **do**

$$\tau_{ijk}^{abc} \leftarrow -(\varepsilon_{ijk}^{abc})^{-1} P_{ijk}^{abc} \left( \sum_d \tau_{ij}^{ad} g_{bdck} - \sum_l \tau_{il}^{ab} g_{ljck} \right)$$

$$\tilde{\tau}_{ijk}^{abc} \leftarrow 4\tau_{ijk}^{abc} - 2\tau_{ijk}^{acb} - 2\tau_{ijk}^{cba} - 2\tau_{ijk}^{bac} + \tau_{ijk}^{bca} + \tau_{ijk}^{cab}$$

**for** Permutations of i, j, k **do**

$$\tilde{D}_{ia}^{0,m} += \sum_{jk}^{bc} \tilde{\tau}_{ijk}^{abc} \Gamma_{bcjk}$$

**end for**

**end for**

**end for**

**end for**

---

## Geometries

Here we list the geometries of the molecules used in the calculations presented in the application section of the paper.

Table 1: Geometry of acetamide in Ångstrom obtained from Ref. 2.

| Atom | x          | y          | z          |
|------|------------|------------|------------|
| O    | 0.000 000  | 1.229 439  | 0.000 000  |
| N    | 1.158 967  | -0.727 718 | 0.000 000  |
| C    | -1.267 042 | -0.831 610 | 0.000 000  |
| C    | 0.000 000  | 0.000 000  | 0.000 000  |
| H    | 1.173 209  | -1.735 763 | 0.000 000  |
| H    | 2.035 841  | -0.226 201 | 0.000 000  |
| H    | -2.121 189 | -0.156 089 | 0.000 000  |
| H    | -1.310 647 | -1.472 742 | 0.885 504  |
| H    | -1.310 647 | -1.472 742 | -0.885 504 |

Table 2: Geometry of L-proline in Ångstrom obtained from Ref. 3.

| Atom | x       | y       | z       |
|------|---------|---------|---------|
| O    | 2.1617  | -0.9509 | -0.1119 |
| O    | 1.5688  | 1.2164  | -0.4953 |
| N    | -0.7807 | 0.9314  | 0.7770  |
| C    | 0.0834  | -0.2476 | 0.7251  |
| C    | -0.7235 | -1.3171 | -0.0031 |
| C    | -1.9888 | -0.6106 | -0.4752 |
| C    | -1.6499 | 0.8635  | -0.3933 |
| C    | 1.3289  | 0.1149  | -0.0235 |
| H    | 0.3625  | -0.5522 | 1.7389  |
| H    | -0.9873 | -2.1429 | 0.6671  |
| H    | -0.1919 | -1.7411 | -0.8624 |
| H    | -2.2798 | -0.9157 | -1.4848 |
| H    | -2.8187 | -0.8485 | 0.2018  |
| H    | -1.1204 | 1.1932  | -1.2945 |
| H    | -2.5424 | 1.4831  | -0.2694 |
| H    | -0.2509 | 1.8003  | 0.8023  |
| H    | 2.9837  | -0.7341 | -0.6014 |

Table 3: Geometry of furan in Ångstrom. The geometry was optimized using B3LYP with def2-TZVP basis set as implemented in Orca.<sup>4-7</sup>

| Atom | x         | y          | z          |
|------|-----------|------------|------------|
| O    | 0.000 000 | 0.000 000  | 1.128 606  |
| C    | 0.000 000 | 0.716 455  | -0.983 624 |
| C    | 0.000 000 | -0.716 455 | -0.983 624 |
| C    | 0.000 000 | 1.094 306  | 0.318 066  |
| C    | 0.000 000 | -1.094 306 | 0.318 066  |
| H    | 0.000 000 | 1.370 213  | -1.839 429 |
| H    | 0.000 000 | -1.370 213 | -1.839 429 |
| H    | 0.000 000 | 2.048 735  | 0.813 913  |
| H    | 0.000 000 | -2.048 735 | 0.813 913  |

## References

- (1) Stanton, J. F.; Bartlett, R. J. The equation of motion coupled-cluster method. A systematic biorthogonal approach to molecular excitation energies, transition probabilities, and excited state properties. *J. Chem. Phys.* **1993**, *98*, 7029–7039.
- (2) Schreiber, M.; Silva-Junior, M. R.; Sauer, S. P. A.; Thiel, W. Benchmarks for electronically excited states: CASPT2, CC2, CCSD, and CC3. *J. Chem. Phys.* **2008**, *128*, 134110.
- (3) National Center for Biotechnology Information, PubChem Database. L-Proline. 2020; <https://pubchem.ncbi.nlm.nih.gov/compound/L-Proline>, CID=145742.
- (4) Becke, A. D. Density-functional thermochemistry. III. The role of exact exchange. *J. Chem. Phys.* **1993**, *98*, 5648–52.
- (5) Neese, F. The ORCA program system. *WIREs Computational Molecular Science* **2012**, *2*, 73–78.
- (6) Neese, F. Software update: the ORCA program system, version 4.0. *WIREs Computational Molecular Science* **2018**, *8*, e1327.
- (7) Weigend, F. Accurate Coulomb-fitting basis sets for H to Rn. *Phys. Chem. Chem. Phys.* **2006**, *8*, 1057–1065.
